# Supplementary material for: Highly Efficient White Organic Light-Emitting Diodes Based on Phosphorescent Iridium Complexes with Multi-Light-Emitting Layers
Source: MDPI journal article supplement (doi:10.3390/photonics9100767), 2022-10-13
Supplement: s1 [file s1]

## Supplementary Materials

### Highly Efficient White Organic Light-Emitting Diodes Based on Phosphorescent Iridium Complexes with Multi-Light-Emitting Layers

Ruixia Wu, Xiaokang Li, Weiqiang Liu and Liang Zhou \*

---

\* Correspondence to: State Key Laboratory of Rare Earth Resource Utilization, Changchun Institute of Applied Chemistry, Chinese Academy of Sciences, Renmin Street 5625, Changchun 130022, China. Tel.: +86-431-8526-2855; Fax: +86-431-8569-8041  
*E-mail address:* zhoul@ciac.ac.cn

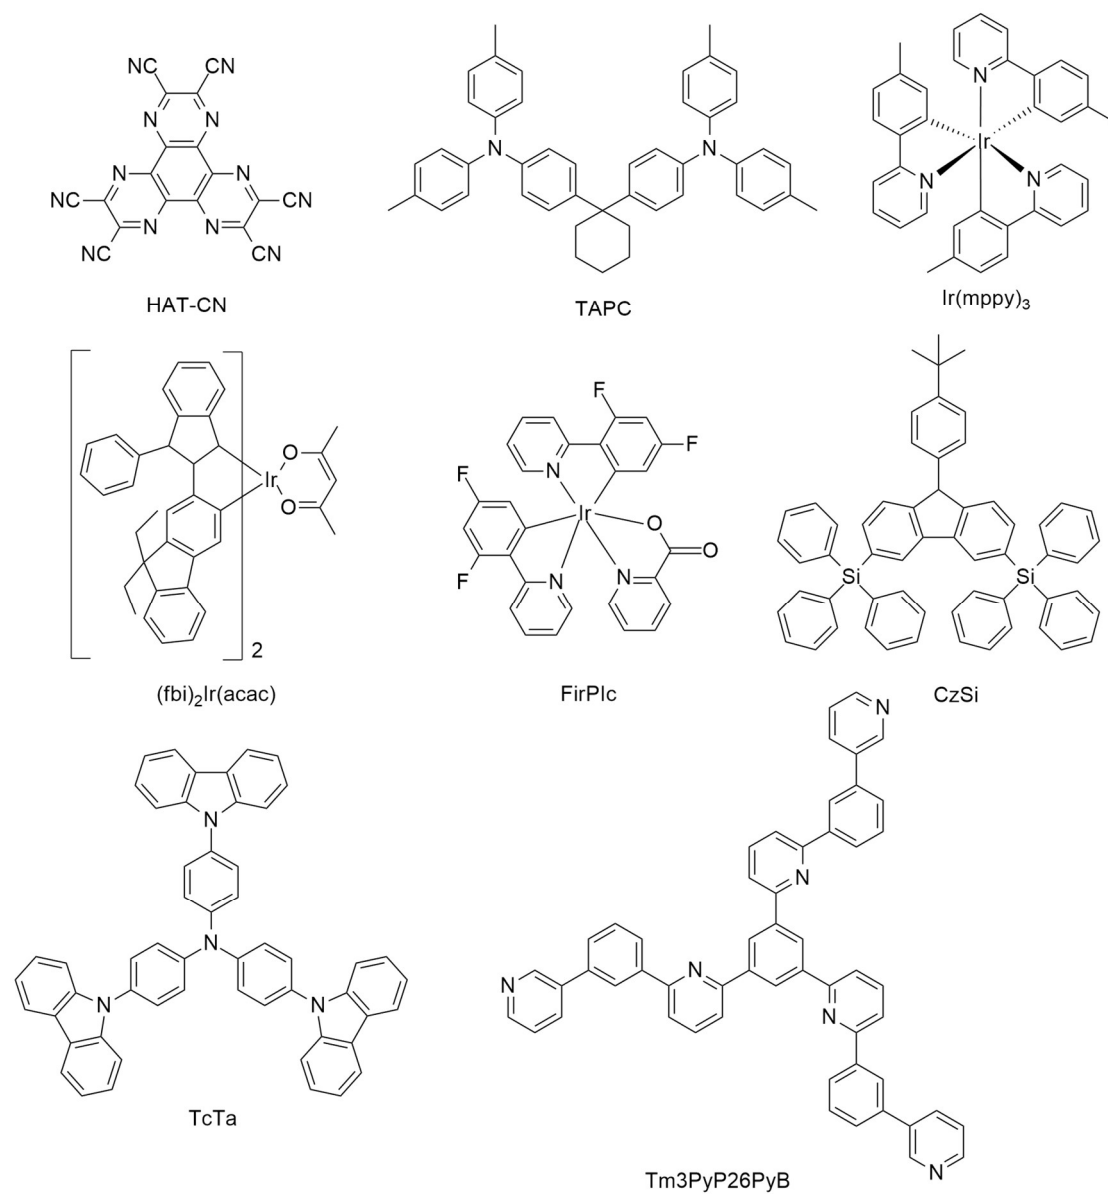

**Scheme S1.** The molecular structures of organic materials used in this work.

**Table S1.** The key properties of single-EML devices with different doping concentrations of (fbi)<sub>2</sub>Ir(acac).

| Device  | V <sub>tum-on</sub> | B <sup>a</sup>        | η <sup>b</sup> (EQE <sup>c</sup> ) | η <sub>p</sub> <sup>d</sup> | η <sup>e</sup> (cd A <sup>-1</sup> ) (EQE <sup>f</sup> ) | CIE <sub>x,y</sub> <sup>g</sup> |
|---------|---------------------|-----------------------|------------------------------------|-----------------------------|----------------------------------------------------------|---------------------------------|
|         | (V)                 | (cd m <sup>-2</sup> ) | (cd A <sup>-1</sup> )              | (lm W <sup>-1</sup> )       | (1000 cd m <sup>-2</sup> )                               |                                 |
| S-1 wt% | 2.9                 | 69370                 | 47.56 (14.60%)                     | 42.48                       | 47.35 (14.52%)                                           | (0.318, 0.603)                  |
| S-2 wt% | 2.9                 | 56100                 | 44.48 (14.42%)                     | 38.49                       | 43.68 (14.11%)                                           | (0.370, 0.570)                  |
| S-3 wt% | 2.9                 | 62920                 | 41.86 (13.85%)                     | 39.85                       | 40.07 (13.17%)                                           | (0.391, 0.558)                  |

<sup>a</sup> The data for maximum brightness (B), <sup>b</sup> maximum current efficiency (η<sub>c</sub>), <sup>c</sup> maximum external quantum efficiency (EQE), <sup>d</sup> maximum power efficiency (η<sub>p</sub>), <sup>e</sup> current efficiency (η<sub>c</sub>) at the practical brightness of 1000 cd m<sup>-2</sup>, <sup>f</sup> external quantum efficiency (EQE) at the practical brightness of 1000 cd m<sup>-2</sup>, <sup>g</sup> Commission Internationale de l'Eclairage coordinates (CIE<sub>x,y</sub>) at 10 mA cm<sup>-2</sup>.

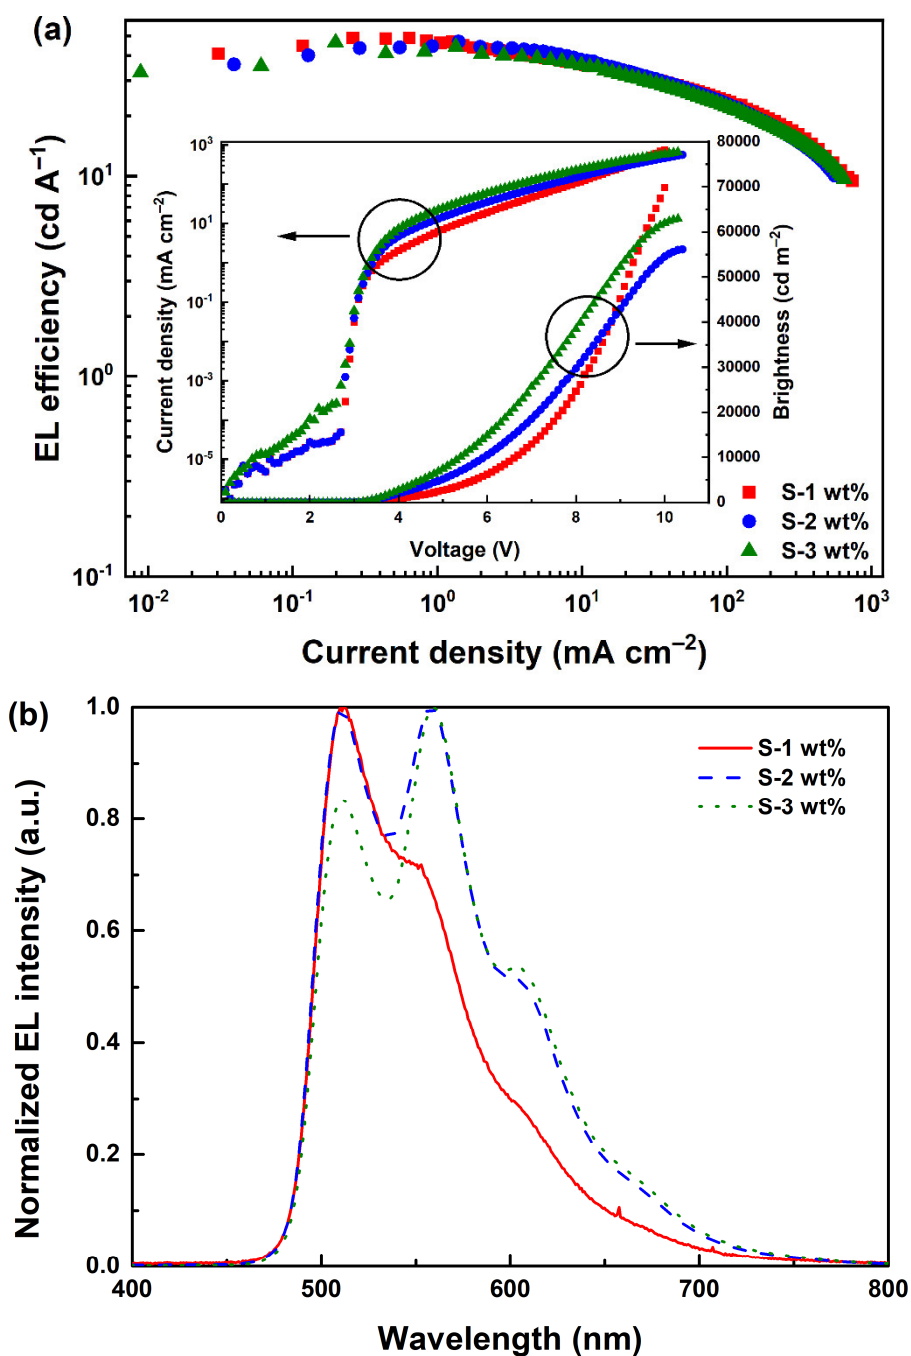

**Figure S1.** (a) EL efficiency-current density ( $\eta$ -J) characteristics of single-EML devices with  $(\text{fbi})_2\text{Ir}(\text{acac})$  at different doping concentrations. Inset: Current density-brightness-voltage (J-B-V) characteristics of single-EML devices with  $(\text{fbi})_2\text{Ir}(\text{acac})$  at different doping concentrations. (b) Normalized EL spectra of single-EML devices with  $(\text{fbi})_2\text{Ir}(\text{acac})$  at different doping concentrations operating at  $10 \text{ mA cm}^{-2}$ .

**Table S2.** The key properties of double-EMLs devices with different doping concentrations of (fbi)<sub>2</sub>Ir(acac).

| Device  | V <sub>tum-on</sub> | B <sup>a</sup>        | η <sup>b</sup> (EQE <sup>c</sup> ) | η <sub>p</sub> <sup>d</sup> | η <sub>c</sub> <sup>e</sup> (cd A <sup>-1</sup> ) (EQE <sup>f</sup> ) | CIE <sub>x,y</sub> <sup>g</sup> |
|---------|---------------------|-----------------------|------------------------------------|-----------------------------|-----------------------------------------------------------------------|---------------------------------|
|         | (V)                 | (cd m <sup>-2</sup> ) | (cd A <sup>-1</sup> )              | (lm W <sup>-1</sup> )       | (1000 cd m <sup>-2</sup> )                                            |                                 |
| D-1 wt% | 2.7                 | 62800                 | 52.65 (17.20%)                     | 48.52                       | 46.83 (15.15%)                                                        | (0.334, 0.568)                  |
| D-2 wt% | 2.7                 | 46150                 | 46.34 (16.24%)                     | 44.12                       | 42.67 (14.85%)                                                        | (0.425, 0.526)                  |
| D-3 wt% | 2.8                 | 48590                 | 43.02 (16.23%)                     | 40.62                       | 36.49 (12.92%)                                                        | (0.446, 0.517)                  |

<sup>a</sup> The data for maximum brightness (B), <sup>b</sup> maximum current efficiency (η<sub>c</sub>), <sup>c</sup> maximum external quantum efficiency (EQE), <sup>d</sup> maximum power efficiency (η<sub>p</sub>), <sup>e</sup> current efficiency (η<sub>c</sub>) at the practical brightness of 1000 cd m<sup>-2</sup>, <sup>f</sup> external quantum efficiency (EQE) at the practical brightness of 1000 cd m<sup>-2</sup>, <sup>g</sup> Commission Internationale de l'Eclairage coordinates (CIE<sub>x,y</sub>) at 10 mA cm<sup>-2</sup>.

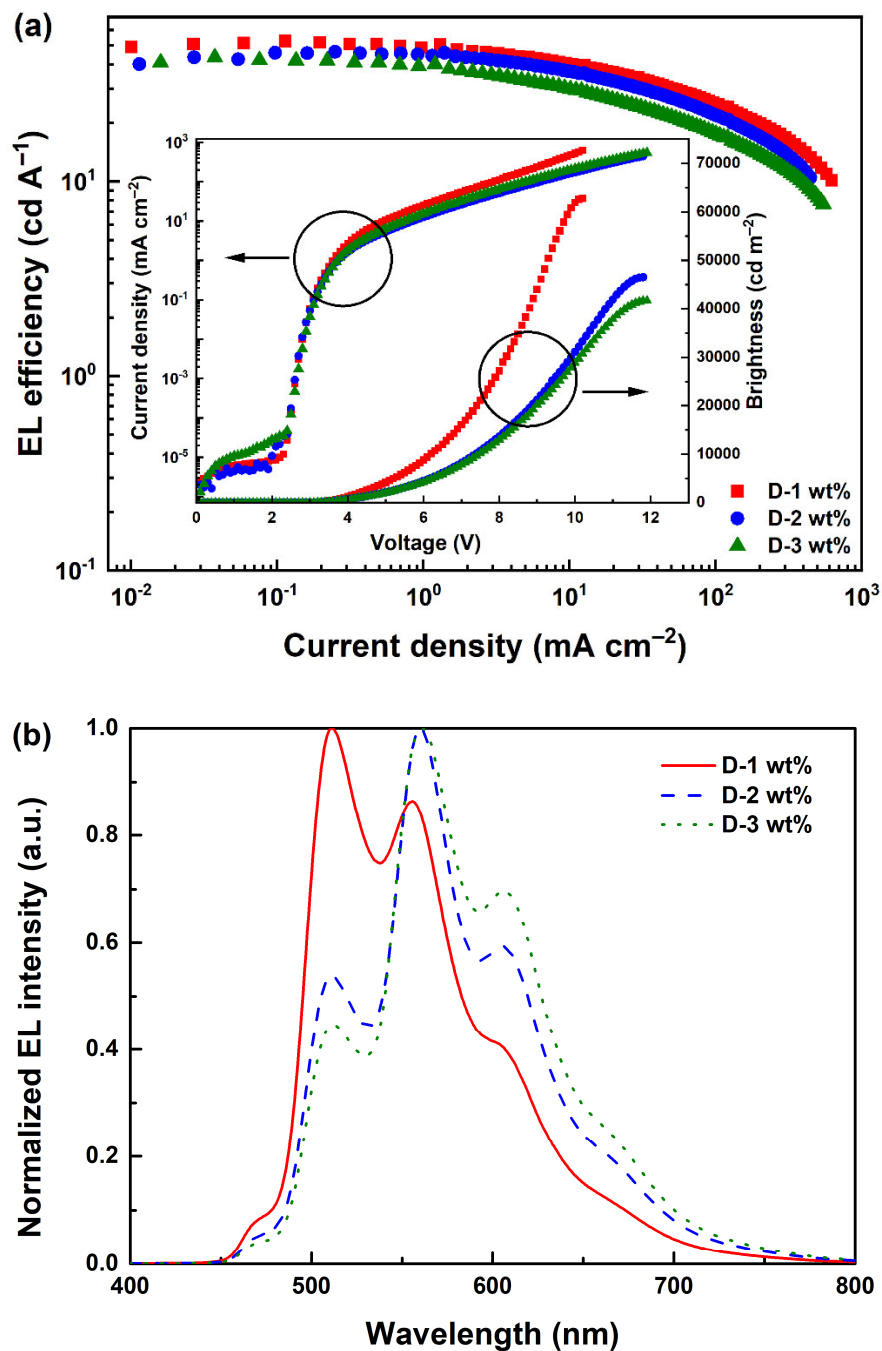

**Figure S2** (a) EL efficiency-current density ( $\eta$ -J) characteristics of double-EMLs devices with  $(\text{fbi})_2\text{Ir}(\text{acac})$  at different doping concentrations. Inset: Current density-brightness-voltage (J-B-V) characteristics of double-EMLs devices with  $(\text{fbi})_2\text{Ir}(\text{acac})$  at different doping concentrations. (b) Normalized EL spectra of double-EMLs devices with  $(\text{fbi})_2\text{Ir}(\text{acac})$  at different doping concentrations operating at  $10 \text{ mA cm}^{-2}$ .

**Table S3.** Summary of EQE, CE and PE values of reported WOLEDs.

| ref       | EQE <sub>max</sub> (%) <sup>a</sup> | CE <sub>max</sub> (cd A <sup>-1</sup> ) <sup>b</sup> | PE <sub>max</sub> (lm W <sup>-1</sup> ) <sup>c</sup> |
|-----------|-------------------------------------|------------------------------------------------------|------------------------------------------------------|
| 34        | 7.0                                 | 15.5                                                 | 12.8                                                 |
| 35        | 12.2                                | -                                                    | -                                                    |
| 36        | -                                   | 21.0                                                 | -                                                    |
| this work | 16.8%                               | 44.92                                                | 42.85                                                |

<sup>a</sup> The maximum external quantum efficiency (EQE<sub>max</sub>); <sup>b</sup> the maximum current efficiency (CE<sub>max</sub>); <sup>c</sup> the maximum power efficiency (PE<sub>max</sub>).

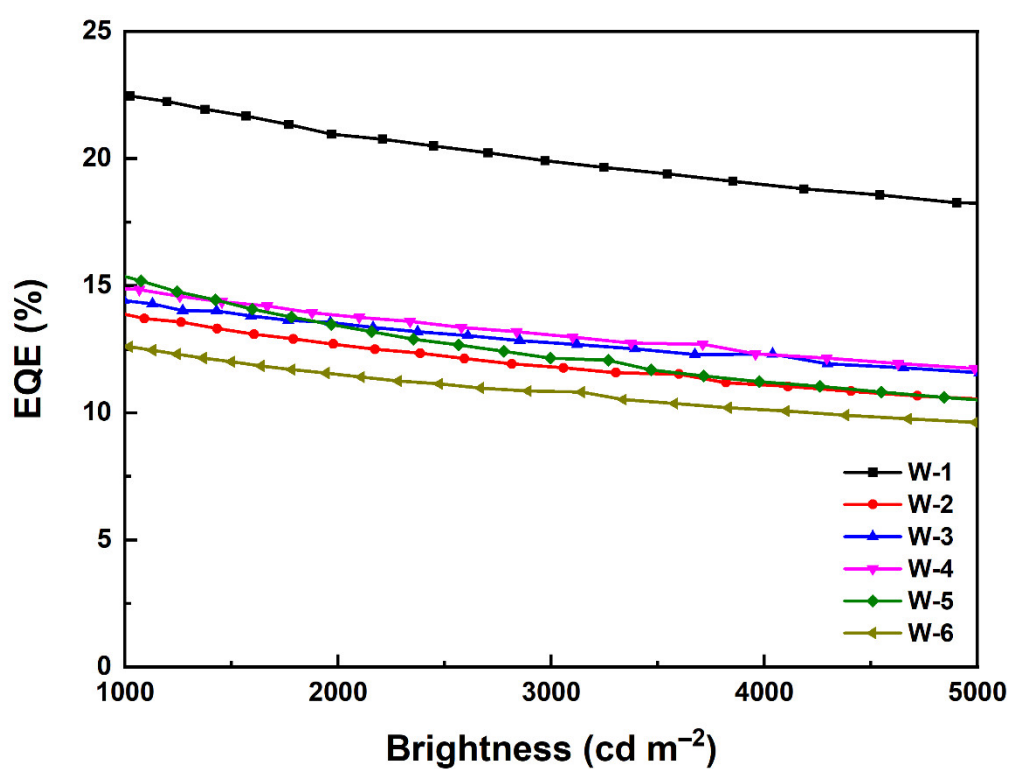

**Figure S3.** EQE-Luminance characteristics of devices W1-W6.
